# Supplementary material
Source: PubMed Central journal article supplement (PMC5983031)

**Supplemental Table 1.** Assessments completed by each participant group (N=80).

| Assessment               | WFS (n=45) |               | Comparison<br>(n=35) |
|--------------------------|------------|---------------|----------------------|
|                          | All (n=45) | Clinic (n=20) |                      |
| Activity Questionnaire   |            |               |                      |
| Part A                   | X          | X             |                      |
| Part B                   | X          | X             |                      |
| Part C                   | X          | X             |                      |
| Part D                   | X          | X             | X                    |
| Impairment-level testing |            | X             | X                    |

**Supplemental Table 2.** Part D Mean Domain Participation Scores for WFS and comparison participants (higher scores are better).

| Children                            | WFS (n=20) | Comparison (n=25) |
|-------------------------------------|------------|-------------------|
| Obligatory Chores                   | 84%        | 90%               |
| Quiet Leisure Activities            | 72%        | 70%               |
| Social and Entertainment            | 75%        | 83%               |
| Active Leisure and Fitness          | 53%        | 60%               |
| Education and Learning <sup>^</sup> | 60%        | 42%               |
| Work <sup>*</sup>                   | 41%        | 66%               |
| Adults                              | WFS (n=25) | Comparison (n=11) |
| Obligatory Chores <sup>*</sup>      | 61%        | 86%               |
| Leisure                             | 63%        | 78%               |
| Social <sup>*</sup>                 | 63%        | 79%               |
| Health, Wellness and Fitness        | 85%        | 88%               |
| Education and Learning <sup>*</sup> | 32%        | 85%               |
| Work                                | 40%        | 60%               |
| Parenting                           | 9%         | 0%                |

\* WFS < Comparison,  $p < 0.05$

<sup>^</sup> WFS > Comparison,  $p < 0.05$

**Supplemental Table 3.** Part D Mean Domain Problematic Activity Scores for WFS and comparison participants (higher scores are worse).

| Children                     | WFS (n=20) | Comparison (n=25) |
|------------------------------|------------|-------------------|
| Obligatory Chores*           | 38%        | 2%                |
| Quiet Leisure Activities*    | 11%        | 2%                |
| Social and Entertainment*    | 13%        | 3%                |
| Active Leisure and Fitness*  | 15%        | 5%                |
| Education and Learning*      | 16%        | 6%                |
| Work*                        | 50%        | 6%                |
| Adults                       | WFS (n=25) | Comparison (n=11) |
| Obligatory Chores*           | 14%        | 1%                |
| Leisure                      | 11%        | 3%                |
| Social                       | 19%        | 12%               |
| Health, Wellness and Fitness | 6%         | 6%                |
| Education and Learning       | 1%         | 1%                |
| Work                         | 2%         | 4%                |
| Parenting                    | 3%         | 0%                |

\* WFS < Comparison,  $p < 0.05$

**Supplemental Table 4.** Frequencies of activities identified as problematic by WFS participants in Part D of the Activity Questionnaire.

| Children (n=18) |                                                       |                                   |                            | Adults (n=24) |                                                       |                                   |                               |
|-----------------|-------------------------------------------------------|-----------------------------------|----------------------------|---------------|-------------------------------------------------------|-----------------------------------|-------------------------------|
| Rank            | n (%) of people identifying activities as problematic | Activity                          | Activity Domain            | Rank          | n (%) of people identifying activities as problematic | Activity                          | Activity Domain               |
| 1               | 7 (38.89)                                             | Bicycling, skating, skateboarding | Active Leisure and Fitness | 1             | 12 (50)                                               | Driving                           | Obligatory Chores             |
| 2               | 6 (33.33)                                             | Team sports                       | Social and Entertainment   | 1             | 12 (50)                                               | Being in a long term relationship | Social                        |
|                 |                                                       |                                   |                            | 2             | 10 (41.67)                                            | Going on a date                   | Social                        |
|                 |                                                       |                                   |                            | 3             | 5 (20.83)                                             | Meeting new people                | Social                        |
|                 |                                                       |                                   |                            | 3             | 5 (20.83)                                             | Exercising/fitness indoor         | Health, Wellness, and Fitness |

**Supplemental Table 5.** WFS Children and Adult Symptom Severity data.

| Assessment          | Children     | Adults        |
|---------------------|--------------|---------------|
| MiniBEST            | 19.50 (4.22) | 18.67 (5.96)  |
| TUG                 | 7.68 (0.92)  | 8.95 (3.10)   |
| Pure tone Average   | 9.03 (6.29)  | 32.19 (29.18) |
| WURS Physical Scale | 7.56 (3.84)  | 11.00 (11.84) |
| LOGMAR              |              |               |
| Mild/Moderate       | 8            | 6             |
| Severe/Profound     | 1            | 3             |

**Supplemental Figure 1.** Reported prevalence of WFS symptoms in each age group.

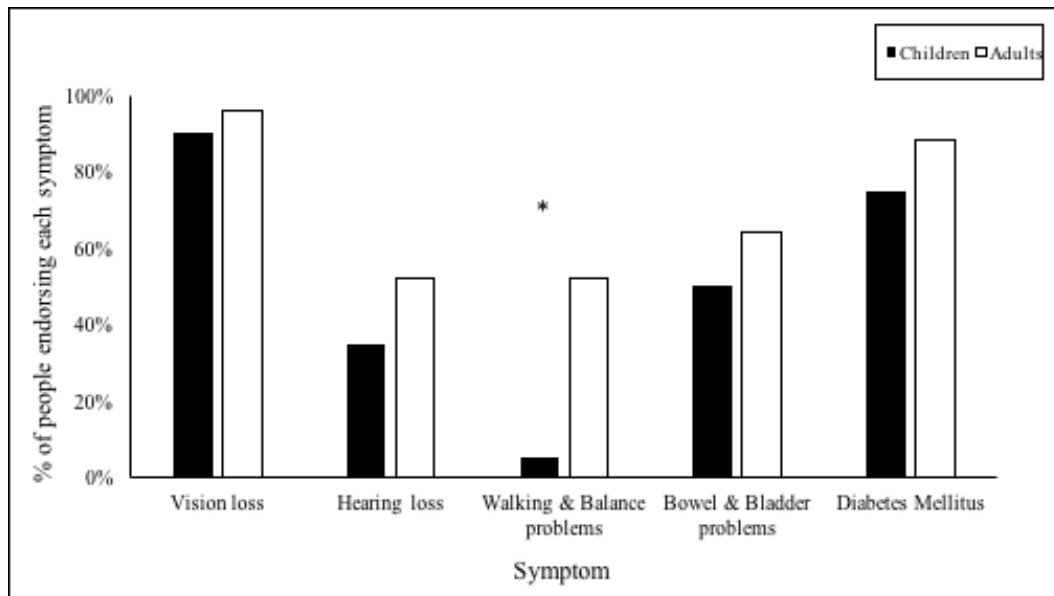

\* $p = 0.001$

**Supplemental Figure 2.** Relationship of severity of vision loss and reported impact of vision loss on daily activities (higher scores indicate greater impact) among adult WFS participants.

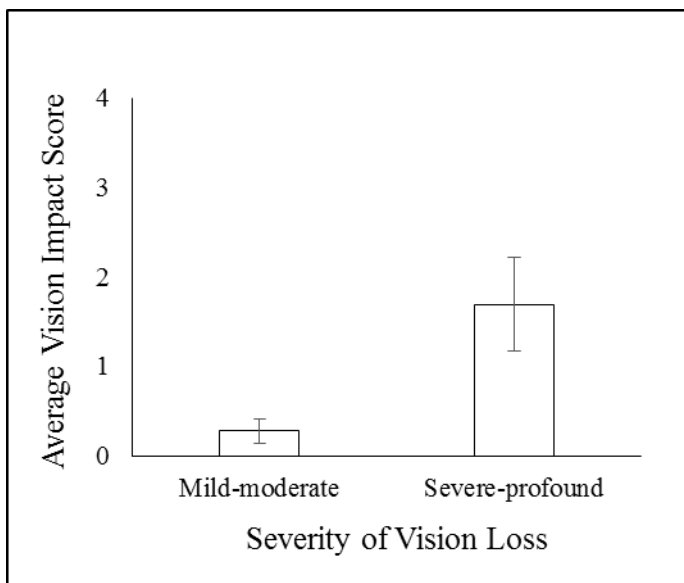

**Supplemental Figure 3.** Relationship of activity participation and (A) balance, (B) gait, (C) hearing, and (D) overall symptom severity among adult WFS participants. Higher MiniBEST scores indicate better balance, and higher TUG, Puretone Average, and WURS scores indicate poorer gait, hearing and overall symptom severity, respectively.

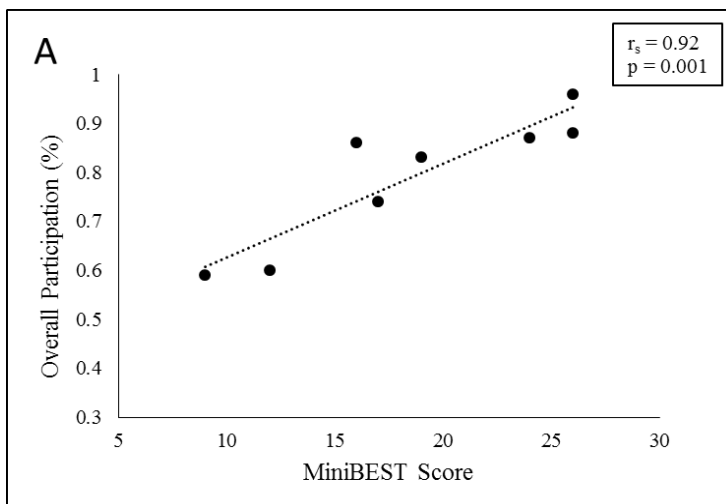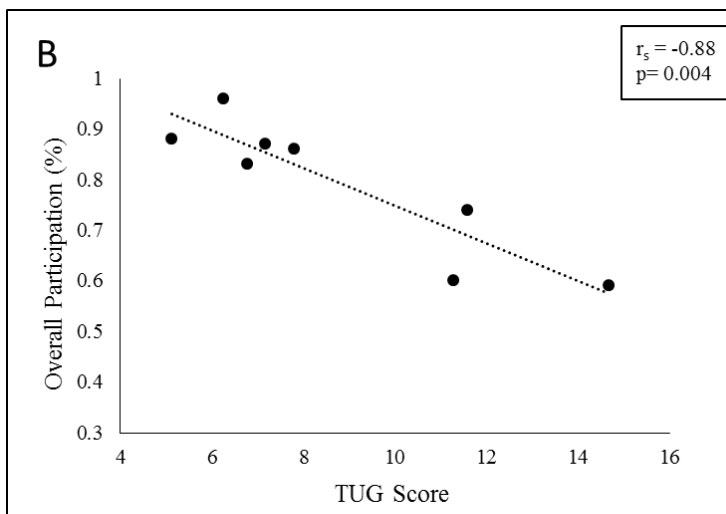



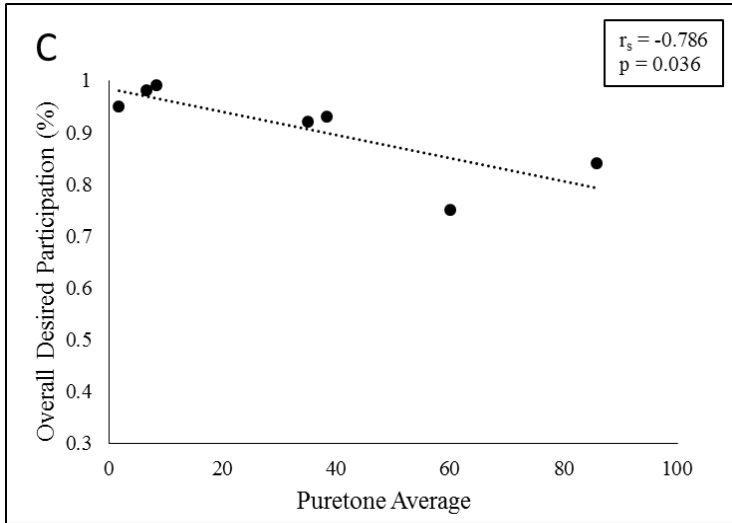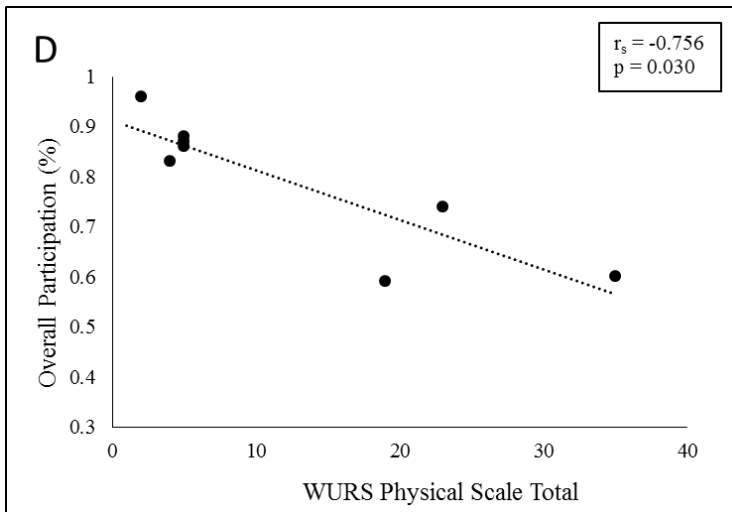

Supplement: NIHMS962973-supplement-supplement_1.pdf [file NIHMS962973-supplement-supplement_1.pdf]
